# Supplementary material for: A sunlight sensitive metal–organic framework film for the environment-friendly self-sterilization application
Source: Royal Society of Chemistry journal article supplement (doi:10.1039/d4qi00715h), 2024-01-01
Supplement: d4qi00715h1.pdf [file d4qi00715h1.pdf]

## Electronic Supplementary Information (ESI)

### **A Sunlight Sensitive Metal-organic Frameworks Film for the Environment-friendly Self-sterilization Applications**

Lingwan Hao<sup>a</sup>, Jie Gao<sup>b</sup>, Xiaoli Han<sup>a</sup>, Zexiang Li<sup>a</sup>, Yanhong Dong<sup>\*a</sup>, Liwei Sun<sup>a</sup>, Lu Zhou<sup>a</sup>, Zhaocai Ning<sup>a</sup>, Jie Zhao<sup>b</sup>, Rujian Jiang<sup>\*a</sup>

*<sup>a</sup> School of Chemistry and Pharmaceutical Engineering, Science and Technology Innovation Center, Shandong First Medical University & Shandong Academy of Medical Sciences, Jinan, 250021, China*

*<sup>b</sup> Key Laboratory of Bionic Engineering, Ministry of Education, Jilin University, Changchun 130022, China.*

*\* Corresponding author:*

*E-mail address: [jiangrujian@sdfmu.edu.cn](mailto:jiangrujian@sdfmu.edu.cn)*

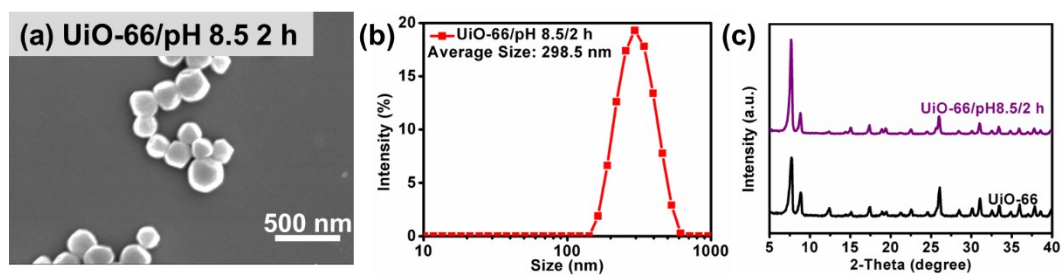

**Fig. S1.** (a) SEM image and (b) DLS measurement image, and (c) XRD of UiO-66 particles after being immersed in Tris-HCl buffer (pH=8.5) for 2 h.

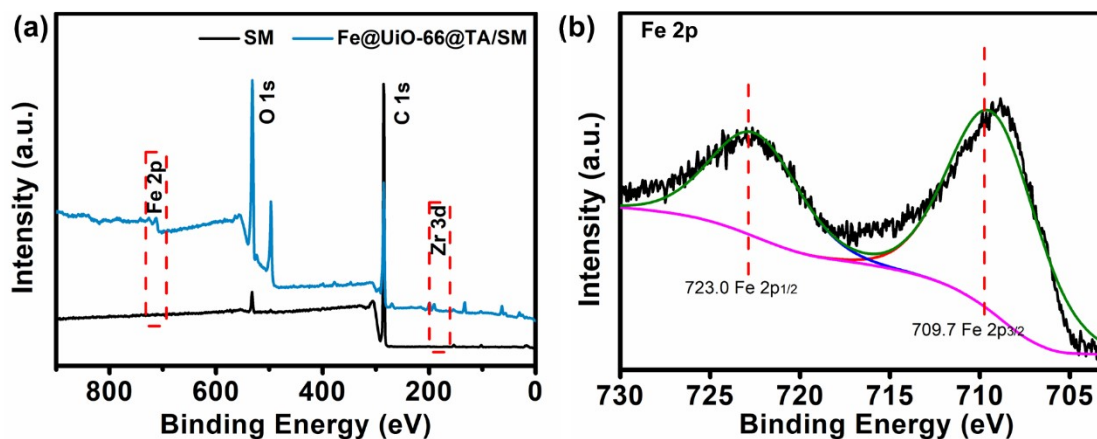

**Fig. S2.** XPS spectra of SM and Fe@UiO-66@TA/SM: (a) survey spectrum and (b) Fe 2p core-level spectrum of Fe@UiO-66@TA.

Compared to the pristine SM, the Fe@UiO-66@TA/SM exhibited a new peak at 187.7 eV, corresponding to Zr 3d (**Fig. S2a**).<sup>1</sup> Moreover, the Fe 2p<sub>3/2</sub> signal showed a main peak at ~709.7 eV with a 2p peak separation of ~12–14 eV, consistent with the presence of Fe(III) species (**Fig. S2b**).<sup>2</sup>

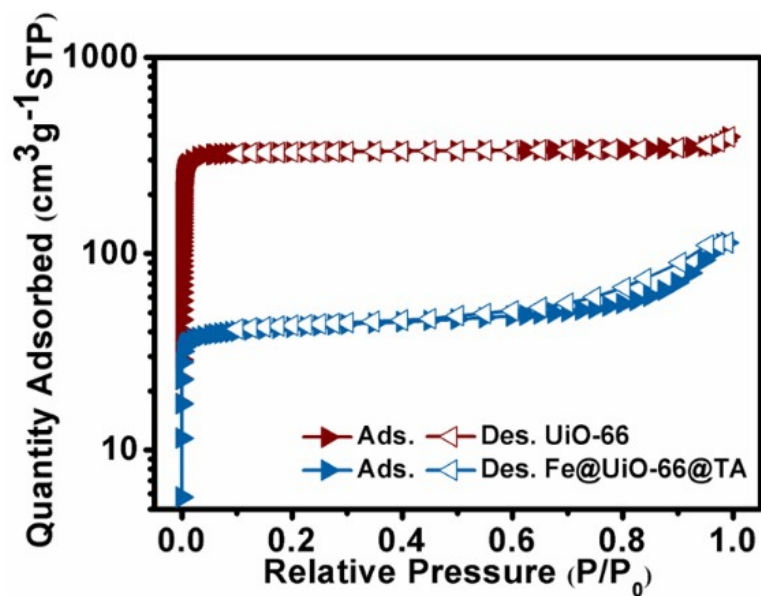

**Fig. S3.** N<sub>2</sub> adsorption-desorption isotherms of UiO-66 and Fe@UiO-66@TA particles.

**Table 1.** BET surface area of the UiO-66 and Fe@UiO-66@TA nanoparticles.

| Entry | Sample       | BET surface area (m <sup>2</sup> /g) |
|-------|--------------|--------------------------------------|
| 1     | UiO-66       | 957.8363 ± 27.7228 m <sup>2</sup> /g |
| 2     | Fe@UiO-66@TA | 128.2058 ± 3.0924 m <sup>2</sup> /g  |

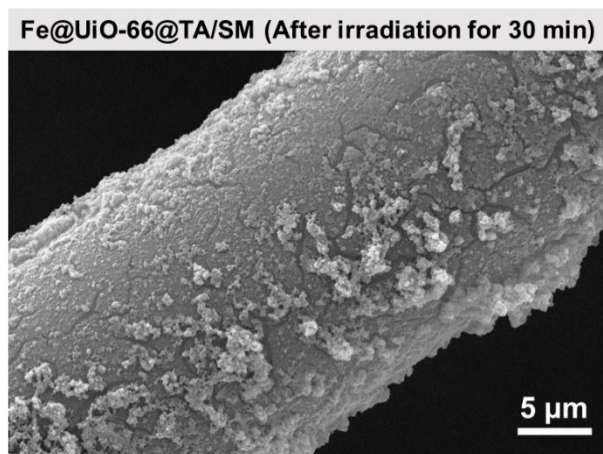

**Fig. S4.** SEM image of Fe@UiO-66@TA/SM after exposing under simulated sunlight for 30 min.

## Reference

1. R. Bariki, D. Majhi, K. Das, A. Behera and B. G. Mishra, Facile synthesis and photocatalytic efficacy of UiO-66/CdIn<sub>2</sub>S<sub>4</sub> nanocomposites with flowerlike 3D-microspheres towards aqueous phase decontamination of triclosan and H<sub>2</sub> evolution, *Appl. Catal. B-Environ.*, 2020, **270**, 118882.
2. Hirotaka; Ejima; Md.; Arifur; Rahim; Kwun; Lun; Society, C. J. C. o. M. A. P. o. t. A. C., Coordination-Driven Multistep Assembly of Metal-Polyphenol Films and Capsules. 2014, 26 (4), 1645-1653.
